# Supplementary material for: Abnormal wiring of the connectome in adults with high-functioning autism spectrum disorder
Source: Springer Nature journal article supplement (doi:10.1186/s13229-015-0058-4), 2015-12-01
Supplement: MOESM1 [file 9785446]

Supplementary table 1. P-values for the local network properties. P-values < 0.05 are emphasized.

| Weight         | Network measure        | Precentral     | Precentral | Frontal Sup    | Frontal Sup | Frontal Sup | Frontal Sup    | Frontal Mid | Frontal Mid | Frontal Mid    | Frontal Mid |
|----------------|------------------------|----------------|------------|----------------|-------------|-------------|----------------|-------------|-------------|----------------|-------------|
|                |                        | L              | R          | L              | R           | Orb L       | Orb R          | L           | R           | Orb L          | Orb R       |
| Density-weight | Betweenness centrality | <b>0.01783</b> | 0.54073    | 0.65398        | 0.60049     | 0.62918     | 0.38087        | 0.84056     | 0.94463     | 0.10758        | 0.46629     |
|                | Strength               | 0.05219        | 0.12718    | 0.34802        | 0.08038     | 0.43833     | <b>0.00408</b> | 0.32784     | 0.10641     | 0.20036        | 0.07695     |
|                | Clustering coefficient | 0.58070        | 0.21563    | 0.25770        | 0.53923     | 0.17856     | 0.71723        | 0.10221     | 0.42446     | <b>0.01537</b> | 0.75086     |
|                | Local efficiency       | 0.96718        | 0.23154    | 0.70773        | 0.23785     | 0.72089     | 0.08398        | 0.71723     | 0.34060     | <b>0.00611</b> | 0.31309     |
| Binary         | Betweenness centrality | 0.08376        | 0.93094    | <b>0.03860</b> | 0.87128     | 0.35843     | 0.06068        | 0.37495     | 0.42170     | 0.24290        | 0.92099     |
|                | Degree                 | 0.05779        | 0.37963    | 0.35112        | 0.56280     | 0.15349     | <b>0.03733</b> | 0.23629     | 0.39677     | 0.32177        | 0.10785     |
|                | Clustering coefficient | 0.37076        | 0.58331    | 0.23649        | 0.68118     | 0.44464     | 0.35487        | 0.17786     | 0.80251     | <b>0.01401</b> | 0.55546     |
|                | Local efficiency       | 0.16856        | 0.58392    | 0.23830        | 0.50942     | 0.95948     | 0.99231        | 0.18740     | 0.81235     | <b>0.00650</b> | 0.22560     |

  

| Weight         | Network measure        | Frontal Inf | Frontal Inf | Frontal Inf    | Frontal Inf    | Frontal Inf | Frontal Inf | Rolandic | Rolandic | Supp Motor | Supp Motor |
|----------------|------------------------|-------------|-------------|----------------|----------------|-------------|-------------|----------|----------|------------|------------|
|                |                        | Oper L      | Oper R      | Tri L          | Tri R          | Orb L       | Orb R       | Oper L   | Oper R   | Area L     | Area R     |
| Density-weight | Betweenness centrality | NaN         | 0.14764     | 0.80545        | 0.90914        | 0.14647     | 0.80662     | NaN      | 0.25023  | 0.14956    | 0.42089    |
|                | Strength               | 0.29257     | 0.30396     | <b>0.01807</b> | 0.09528        | 0.54571     | 0.97476     | 0.05343  | 0.08849  | 0.34827    | 0.17487    |
|                | Clustering coefficient | 0.50282     | 0.46699     | 0.32751        | 0.19077        | 0.06310     | 0.47246     | 0.50519  | 0.90552  | 0.70269    | 0.30132    |
|                | Local efficiency       | 0.68058     | 0.57071     | 0.31049        | <b>0.01755</b> | 0.34890     | 0.91486     | 0.26136  | 0.32042  | 0.65281    | 0.27472    |
| Binary         | Betweenness centrality | 0.35256     | 0.27811     | 0.77035        | 0.29744        | 0.67431     | 0.15694     | 0.40553  | 0.82166  | 0.56307    | 0.25025    |
|                | Degree                 | 0.39252     | 0.40590     | 0.05865        | 0.34382        | 0.76098     | 0.72268     | 0.08811  | 0.15762  | 0.42388    | 0.57622    |
|                | Clustering coefficient | 0.33530     | 0.78338     | 0.65145        | 0.63319        | 0.15054     | 0.33830     | 0.92337  | 0.69582  | 0.93326    | 0.76251    |
|                | Local efficiency       | 0.62317     | 0.76265     | 0.36408        | 0.23987        | 0.31119     | 0.22277     | 0.86121  | 0.86223  | 0.89743    | 0.34934    |

  

| Weight         | Network measure        | Frontal Sup    |             | Frontal        | Frontal  | Rectus L       | Rectus R | Insula L | Insula R       |                |           |
|----------------|------------------------|----------------|-------------|----------------|----------|----------------|----------|----------|----------------|----------------|-----------|
|                |                        | Olfactory L    | Olfactory R | Medial L       | Medial R |                |          |          |                | Med Orb L      | Med Orb R |
| Density-weight | Betweenness centrality | 0.82968        | 0.39923     | 0.84712        | 0.06620  | 0.93076        | 0.20668  | 0.35689  | 0.22287        | 0.35078        | 0.71139   |
|                | Strength               | 0.27458        | 0.63124     | 0.30433        | 0.94715  | 0.45917        | 0.07087  | 0.06405  | 0.10052        | 0.43348        | 0.37611   |
|                | Clustering coefficient | 0.21266        | 0.37376     | <b>0.02538</b> | 0.19313  | 0.42613        | 0.79621  | 0.66980  | 0.88900        | <b>0.00924</b> | 0.07815   |
|                | Local efficiency       | <b>0.04583</b> | 0.70108     | 0.28232        | 0.30660  | <b>0.00988</b> | 0.39126  | 0.14015  | <b>0.02677</b> | <b>0.01148</b> | 0.10263   |
| Binary         | Betweenness centrality | 0.59912        | 0.91097     | <b>0.02741</b> | 0.42636  | 0.72697        | 0.24348  | 0.13780  | 0.13078        | 0.11699        | 0.35949   |
|                | Degree                 | 0.53497        | 0.69188     | 0.12155        | 0.52535  | 0.91929        | 0.29154  | 0.23809  | 0.23129        | 0.60679        | 0.86714   |
|                | Clustering coefficient | 0.75274        | 0.18523     | <b>0.04317</b> | 0.35961  | 0.75880        | 0.24251  | 0.95401  | 0.89369        | 0.07027        | 0.23819   |
|                | Local efficiency       | 0.36299        | 0.37706     | <b>0.04062</b> | 0.47714  | 0.65933        | 0.68405  | 0.55721  | 0.25280        | 0.06542        | 0.18569   |

| Weight         | Network measure        | Cingulum | Cingulum | Cingulum       | Cingulum | Cingulum | Cingulum | Hippo-   | Hippo-   | ParaHippo- | ParaHippo- |
|----------------|------------------------|----------|----------|----------------|----------|----------|----------|----------|----------|------------|------------|
|                |                        | Ant L    | Ant R    | Mid L          | Mid R    | Post L   | Post R   | campus L | campus R | campal L   | campal R   |
| Density-weight | Betweenness centrality | 0.73945  | 0.98191  | 0.12604        | 0.10398  | NaN      | 0.25023  | 0.52124  | 0.66197  | 0.05519    | 0.42031    |
|                | Strength               | 0.75045  | 0.56237  | <b>0.00391</b> | 0.14999  | 0.88835  | 0.83369  | 0.06515  | 0.63844  | 0.72433    | 0.69138    |
|                | Clustering coefficient | 0.05904  | 0.11597  | 0.27242        | 0.86454  | 0.41490  | 0.92400  | 0.36230  | 0.45261  | 0.92169    | 0.40617    |
|                | Local efficiency       | 0.21498  | 0.20267  | 0.60032        | 0.64887  | 0.21798  | 0.07812  | 0.83796  | 0.92838  | 0.79800    | 0.39552    |
| Binary         | Betweenness centrality | 0.36516  | 0.11621  | <b>0.01761</b> | 0.68703  | 0.64385  | 0.51818  | 0.17175  | 0.90969  | 0.64822    | 0.67184    |
|                | Degree                 | 0.45052  | 0.32434  | <b>0.02651</b> | 0.15960  | 0.38677  | 0.67012  | 0.15471  | 0.71793  | 0.54273    | 0.93173    |
|                | Clustering coefficient | 0.11394  | 0.30841  | <b>0.03010</b> | 0.41064  | 0.50394  | 0.25541  | 0.44430  | 0.52574  | 0.94602    | 0.66001    |
|                | Local efficiency       | 0.12828  | 0.32513  | <b>0.03086</b> | 0.51264  | 0.35018  | 0.60108  | 0.50209  | 0.71559  | 0.99937    | 0.67395    |

| Weight         | Network measure        | Amygdala | Amygdala | Calcarine L    | Calcarine R | Cuneus L | Cuneus R | Lingual L      | Lingual R | Occipital | Occipital Sup |
|----------------|------------------------|----------|----------|----------------|-------------|----------|----------|----------------|-----------|-----------|---------------|
|                |                        | L        | R        |                |             |          |          |                |           | Sup L     | R             |
| Density-weight | Betweenness centrality | 0.25774  | 0.48968  | 0.21027        | 0.77907     | 0.75317  | 0.10623  | 0.82464        | 0.67203   | 0.89734   | 0.60467       |
|                | Strength               | 0.43562  | 0.28584  | 0.80567        | 0.58412     | 0.54338  | 0.66116  | <b>0.01558</b> | 0.10920   | 0.95877   | 0.37333       |
|                | Clustering coefficient | 0.21545  | 0.66608  | <b>0.01142</b> | 0.42057     | 0.36445  | 0.74387  | 0.82326        | 0.53227   | 0.79276   | 0.16205       |
|                | Local efficiency       | 0.12369  | 0.59626  | 0.05018        | 0.33353     | 0.25836  | 0.36803  | 0.33324        | 0.21666   | 0.86031   | 0.47519       |
| Binary         | Betweenness centrality | 0.31623  | 0.46072  | <b>0.03208</b> | 0.41854     | 0.21260  | 0.68587  | 0.12825        | 0.74513   | 0.35651   | 0.47904       |
|                | Degree                 | 0.37148  | 0.30238  | 0.24829        | 0.94769     | 0.51793  | 0.90704  | 0.23352        | 0.81410   | 0.53208   | 0.20363       |
|                | Clustering coefficient | 0.75820  | 0.81584  | 0.32522        | 0.95244     | 0.93907  | 0.27219  | 0.06319        | 0.91922   | 0.36904   | 0.38652       |
|                | Local efficiency       | 0.57325  | 0.34438  | 0.31059        | 0.82334     | 0.80384  | 0.22225  | 0.05753        | 0.89486   | 0.29440   | 0.50652       |

| Weight         | Network measure        | Occipital      | Occipital      | Occipital Inf | Occipital Inf  | Fusiform L | Fusiform R     | Postcentral    | Postcentral    | Parietal Sup   | Parietal Sup |
|----------------|------------------------|----------------|----------------|---------------|----------------|------------|----------------|----------------|----------------|----------------|--------------|
|                |                        | Mid L          | Mid R          | L             | R              |            |                | L              | R              | L              | R            |
| Density-weight | Betweenness centrality | 0.67738        | 0.24596        | 0.98721       | 0.24655        | 0.27476    | 0.18854        | 0.48180        | 0.27335        | 0.33375        | 0.12503      |
|                | Strength               | <b>0.03904</b> | 0.53828        | 0.14669       | 0.08061        | 0.43424    | <b>0.03139</b> | <b>0.01338</b> | <b>0.04532</b> | 0.72839        | 0.10433      |
|                | Clustering coefficient | 0.32011        | <b>0.02067</b> | 0.21072       | 0.13042        | 0.87746    | 0.82856        | 0.79096        | 0.79242        | 0.07700        | 0.85685      |
|                | Local efficiency       | 0.13240        | 0.31856        | 0.50134       | <b>0.04583</b> | 0.96762    | 0.51287        | 0.41903        | 0.76812        | 0.26856        | 0.95218      |
| Binary         | Betweenness centrality | 0.78924        | 0.20722        | 0.08279       | 0.95878        | 0.32060    | 0.16807        | 0.12276        | 0.20239        | <b>0.01639</b> | 0.14734      |
|                | Degree                 | 0.37888        | 0.26761        | 0.21137       | 0.53476        | 0.30010    | <b>0.03570</b> | 0.10567        | 0.08016        | 0.73296        | 0.10525      |
|                | Clustering coefficient | 0.71663        | <b>0.03569</b> | 0.27690       | 0.16844        | 0.59276    | 0.76179        | 0.38506        | 0.93103        | 0.11538        | 0.60377      |
|                | Local efficiency       | 0.63287        | 0.09536        | 0.23113       | 0.22985        | 0.66117    | 0.99919        | 0.23922        | 0.91204        | 0.05568        | 0.57891      |

| Weight         | Network measure        | Parietal Inf |         | Supra-     |            | Angular |         | Precuneus |         | Paracentral | Paracentral |
|----------------|------------------------|--------------|---------|------------|------------|---------|---------|-----------|---------|-------------|-------------|
|                |                        | L            | R       | Marginal L | Marginal R | L       | R       | L         | R       | Lobule L    | Lobule R    |
| Density-weight | Betweenness centrality | 0.40896      | 0.12044 | 0.31715    | 0.24726    | NaN     | 0.11022 | 0.84519   | 0.19267 | 0.08804     | 0.28482     |
|                | Strength               | 0.09525      | 0.13676 | 0.47906    | 0.09177    | 0.54924 | 0.15084 | 0.19046   | 0.10287 | 0.84623     | 0.93195     |
|                | Clustering coefficient | 0.90719      | 0.44006 | 0.59290    | 0.11610    | 0.99884 | 0.08400 | 0.29707   | 0.29425 | 0.61545     | 0.14917     |
|                | Local efficiency       | 0.42155      | 0.34572 | 0.15863    | 0.13159    | 0.40405 | 0.09868 | 0.23925   | 0.14266 | 0.68092     | 0.66136     |
| Binary         | Betweenness centrality | 0.45880      | 0.33620 | 0.74049    | 0.14171    | 0.41280 | 0.93318 | 0.49464   | 0.56419 | 0.45118     | 0.21015     |
|                | Degree                 | 0.23604      | 0.20236 | 0.56672    | 0.29221    | 0.82257 | 0.13674 | 0.47061   | 0.72533 | 0.53020     | 0.96570     |
|                | Clustering coefficient | 0.17216      | 0.56270 | 0.37716    | 0.62619    | 0.42992 | 0.11642 | 0.85111   | 0.70631 | 0.31511     | 0.06682     |
|                | Local efficiency       | 0.12287      | 0.44664 | 0.22008    | 0.80050    | 0.57462 | 0.10558 | 0.48225   | 0.76804 | 0.18162     | 0.05356     |

| Weight         | Network measure        | Caudate        |                | Putamen        |                | Pallidum |         | Thalamus       |                | Heschl L       | Heschl R |
|----------------|------------------------|----------------|----------------|----------------|----------------|----------|---------|----------------|----------------|----------------|----------|
|                |                        | L              | R              | L              | R              | L        | R       | L              | R              |                |          |
| Density-weight | Betweenness centrality | 0.56032        | <b>0.02491</b> | 0.43607        | 0.18028        | 0.63630  | 0.23280 | 0.62111        | 0.11095        | NaN            | NaN      |
|                | Strength               | <b>0.02091</b> | 0.72034        | <b>0.03148</b> | <b>0.02659</b> | 0.48931  | 0.72776 | <b>0.00617</b> | 0.05150        | <b>0.00235</b> | 0.92480  |
|                | Clustering coefficient | 0.74506        | <b>0.00074</b> | 0.57960        | <b>0.01145</b> | 0.14610  | 0.53894 | 0.51453        | 0.81502        | 0.15900        | 0.86000  |
|                | Local efficiency       | 0.80029        | <b>0.01210</b> | 0.17262        | 0.06570        | 0.58495  | 0.73695 | 0.74135        | 0.83023        | <b>0.02147</b> | 0.91943  |
| Binary         | Betweenness centrality | 0.22623        | <b>0.00009</b> | 0.16593        | 0.93675        | 0.99044  | 0.22927 | 0.28918        | 0.41768        | 0.97567        | 0.41203  |
|                | Degree                 | <b>0.01825</b> | 0.05140        | 0.25273        | 0.12753        | 0.73779  | 0.64610 | <b>0.04043</b> | <b>0.04526</b> | <b>0.02631</b> | 0.87178  |
|                | Clustering coefficient | 0.46129        | <b>0.03615</b> | 0.08812        | 0.13558        | 0.08292  | 0.77905 | 0.22239        | 0.76097        | 0.29798        | 0.91294  |
|                | Local efficiency       | 0.65312        | <b>0.02598</b> | 0.05178        | 0.15231        | 0.08108  | 0.85696 | 0.28628        | 0.87218        | 0.11046        | 0.91124  |

| Weight         | Network measure        | Temporal       |                | Temporal   |                | Temporal       |         | Temporal   |            | Temporal Inf | Temporal Inf   |
|----------------|------------------------|----------------|----------------|------------|----------------|----------------|---------|------------|------------|--------------|----------------|
|                |                        | Sup L          | Sup R          | Pole Sup L | Pole Sup R     | Mid L          | Mid R   | Pole Mid L | Pole Mid R | L            | R              |
| Density-weight | Betweenness centrality | 0.11877        | <b>0.01420</b> | 0.57316    | 0.70725        | 0.21558        | 0.52037 | 0.48473    | 0.85574    | 0.16261      | 0.30222        |
|                | Strength               | <b>0.04803</b> | 0.31967        | 0.84773    | <b>0.00040</b> | <b>0.03630</b> | 0.19478 | 0.08136    | 0.34303    | 0.17607      | <b>0.01740</b> |
|                | Clustering coefficient | 0.99807        | 0.05823        | 0.09745    | 0.75164        | 0.44300        | 0.44360 | 0.28154    | 0.56965    | 0.67291      | 0.78134        |
|                | Local efficiency       | 0.46189        | 0.06369        | 0.09883    | 0.45258        | 0.09113        | 0.37996 | 0.20435    | 0.92757    | 0.50574      | 0.75526        |
| Binary         | Betweenness centrality | 0.56327        | <b>0.04113</b> | 0.18084    | <b>0.04744</b> | 0.96604        | 0.55565 | 0.41570    | 0.45331    | 0.92754      | 0.41820        |
|                | Degree                 | 0.05405        | 0.78278        | 0.29386    | <b>0.00946</b> | 0.51305        | 0.19555 | 0.07415    | 0.21025    | 0.22392      | <b>0.03561</b> |
|                | Clustering coefficient | 0.67420        | 0.18786        | 0.53636    | 0.27549        | 0.72546        | 0.99382 | 0.61598    | 0.71798    | 0.87647      | 0.49075        |
|                | Local efficiency       | 0.97497        | 0.21397        | 0.96156    | 0.37015        | 0.59343        | 0.97682 | 0.36679    | 0.68421    | 0.91870      | 0.69580        |
